# Supplementary material for: Effect of arginine on oligomerization and stability of N-acetylglutamate synthase
Source: PubMed Central journal article supplement (PMC5146650; doi:10.1038/srep38711), 2016-12-09
Supplement: srep38711-s1.pdf [file srep38711-s1.pdf]

**Supplementary Information for:**

**Effect of arginine on oligomerization and stability of N-acetylglutamate synthase**

Haskins N<sup>1</sup>, Mumo A<sup>2</sup>, Brown PH<sup>3</sup>, Tuchman M<sup>1</sup>, Morizono H<sup>1</sup>, Caldovic L<sup>1,\*</sup>

<sup>1</sup>Center for Genetic Medicine Research; Children's National Medical Center, Washington, DC; <sup>2</sup>American Academy of Otolaryngology – Head and Neck Surgery Foundation, Alexandria VA; <sup>3</sup>National Institute of General Medical Sciences, National Institutes of Health, Bethesda, MD.

\*Corresponding Author: Ljubica Caldovic, Ph.D.  
Department of Integrative Systems Biology  
Center for Genetic Medicine Research  
Children's National Medical Center  
111 Michigan Avenue NW  
Washington DC, 20010  
E-mail: [lcaldovic@cnmcresearch.org](mailto:lcaldovic@cnmcresearch.org)  
Phone: (202) 476-5819  
Fax: (202) 476-6014

```

MmNAGS-K NPN-----A-----PGVRQTIIVQL
XcNAGS-K SLP-----AQP-----HKQTRQTIIVRL
yNAGK NG-----FSATRSTVIQL
mNAGS-M LST-----ARAH-----EDAEGAKGRVQSPAVEEPSWTPLP---TPLESPAPPAGRSLVQRDIQAF
hNAGS-M LST-----AWSQPQPPEEYAGADDVVSQSPVAEEPSWVSPRPPVPHESPEPPSGRSLVQRDIQAF
zfNAGS SAAEVNRRMSSSRTAGHGSKTPLWSQ-----QESYNHSSLGERSAW-----SNRTLIRYRDVKAF
:
:

MmNAGS-K LSHM-RDGKEIREYLHRFSGI---DQERFAVIKVGGAIVQ--DDLPLGLASALAFLOTVGLTPVVVHGGGQQLDAALEAAD
XcNAGS-K LSSX-ASAKEISQYLKRFSQL---DAKRFAVVKVGAVLR--DDLEALTSSLSFLQEVGLTPIVLHGAGPQLDAELSAAG
yNAGK LNNI-STKREVEQYLYKFTSV---SQQQFAVIKVGGAIIIS--DNLHELASCLAFLYHVGLYPIVLHGTGPQVNGRLEAQQ
mNAGS-M LNQCQASPGEARHWLTQFQTCYHSVDKPFVAVMEVDEEVIRCPQAVSRALAFALAFLOQMDMKPLVVLGLPTPTA-P-----
hNAGS-M LNQCQASPGEARHWLTQFQTCYHSADKPFVAVIEVDEEVLKCQVSSSLAFALAFLOQMDMKPLVVLGLPAPTA-P-----
zfNAGS LREIGGDPREARYWLTQFQTCYHSADKPFVAVIEVDEEVLKCQVSSSLAFALAFLOQMDMKPLVVLGLPAPTA-P-----
* * : * * * * * : : : * * * * : : : * * *
:

MmNAGS-K IPTERVDGLRVTRDEAIP IIRD TLTQANLALVDAIRDAGGAAVPRGVFEADIVD-ADKLGRVGEPRHIHLDLVGSAAAR
XcNAGS-K IEKQTVNGLRVTS PHALAIVRKVFQASNLKLVEALQNGARATSITGGVFEAEYLN-RDQYGLVGEVKA VNLAPIEASLQ
yNAGK IEPDYIDGIRITDEHTMAVVRKCFLEQNLKLVTALEQLGVRARPITSGVFTADYLD-KDKYKLVGNIKSVTKPEIASIK
mNAGS-M -----SGCL-----SFWEAKAQLAQSCVKLVDELHRNAATAVPPFFGGGSVLSSAAE-PAPHASYGGIVAVETDLLQWCLE
hNAGS-M -----SGCL-----SFWEAKAQLAKSCVKLVDELHRNAAA VPPFFGGGSVLSSAAE-PAPHASYGGIVSVETDLLQWCLE
zfNAGS -----DHTRS--ATDSPLARTVMVKHCQALTEALQDNSANVMPPFSSEALLQLQDNPLDGSSSGSPVVVDSALLQWTL
. : : * . . . . . : : : * : : :
:

MmNAGS-K AGQAAI LACLGETPDGTLVNI NADVA VRALVHALQPYKVVFLTGTGGLLDE-DGDILSSINLATDFGDLMDQADVWVNGGMR
XcNAGS-K AGSIPVITSLGETPSGQILNVNADFAANELVQELQPYKIIFLTGTGGLLDA-EGKLIDSINLSTEYDHLXQQPWINGGXR
yNAGK AGALPILTSLAETASGQMLNVNADVAAGELARVFEPLKIVLYLNEKGGIINGSTGEKISMINLDEEYDDLKMQSVWKYGTK
mNAGS-M SNSIPILCPIGETAARRSVLLDSLEVTASLAKALQPTKIFLNNSGGLRNN-SQKILSNVNLPADLDLVTNAEWLSIKER
hNAGS-M SGSIPILCPIGETAARRSVLLDSLEVTASLAKALRPTKIFLNNTGGLRDS-SHKVLSNVNLPADLDLVCNAE VVSTKER
zfNAGS CRV I P L V C P V G R D T T G R S S V L R S I Q V T T A I S Q T L Q P L K V I F L N S S G G I R N Q - N H K V L G L V S L P G D L P A L S C A E W L N E V E Q
. : : : . . . : : . . : : : * * : : : . * : : : . : . : * : : * : . :
:

MmNAGS-K LKLEEI KRLDDLPLSSSVSITRPS E LARELFT H A G S G T L I R R G E R I V A T D D K S S L D L G R L D -----NLVKA A F G R P A V E
XcNAGS-K VKIEQIKDLLDRPLLESSVSI TRPADLAKELFTHKGSGLVRRGERVLRATSWDELDPRLT-----SLIESSFGRTLVP
yNAGK LKIREIKELLDYLPRSSSVAI INVQDLQKELFTDSGAGTMIRRGYKLVKRSSIGEFPSADALRKALQRDAGISSGKESVA
mNAGS-M QQIRLIVDVL SRLPHYSSAVITAAS TLLTELF S N K G C G T L F K N A E R M L R V R N L D S L D Q G R L V -----NLVNASFGKKLR
hNAGS-M QQMRLIVDVL SRLPHSSAVITAAS TLLTELF S N K G S G T L F K N A E R M L R V R S L D K L D Q G R L V -----DLVNASFGKKLR
zfNAGS KRIGSIAELLNLLPVESAVLTSANTLLTELF SHKGNV-----FALHRYSSLEDIDVDRL-----ALINKSFEKNLRE
: : * : * . * * * . : * * * : * . . : : . : : : : : : : : : : :
:

MmNAGS-K GYWDRL--RVDRAFVTESYRAAAITTR--LDGW--VYLDKFAVLD DARGEGLGRVWVNR LVDYAPQLIWRSR TNNP VNG
XcNAGS-K DYFSNT--KLLRAYVSEN YRAAVILTDEGXLGASALIYLDKFAVLD D A Q G E G L G R A V W V X R E E T P Q L F W R S R H N N Q V N I
yNAGK SYLRYLENSDFVSYADEPLEAVAI VK---DTNV--PTLDKFVCSDAAWLN NVTDNFVNLRRDPALQWV VSENDANIA
mNAGS-M DYLESRLPRLHSIYVSEGYNAAAILTVEPVLGGT--PYLDK FV V S S R Q G Q G S G Q M L W E C L R R D L Q T L F W R S R V T N P I N P
hNAGS-M DYLASLRPRLHSIYVSEGYNAAAILTMEPVLGGT--PYLDK FV V S S R Q G Q G S G Q M L W E C L R R D L Q T L F W R S R V T N P I N P
zfNAGS DYIASLEGR LHSVYLS EGYSA AAIITTEPVNSGT--PYLDK FV V S S K Q G Q T G Q I L W E C I R Q D F S K L F W R S R T T N R I N P
.* : * * . * . * * * * . : . : : : * * : :
:

MmNAGS-K FYFEEDGAVRRDEWTVFWRGEMGPVEVADVVEKAFALPPTLEA-----P
XcNAGS-K FYAESDGC IKQEKWKVFWYGLNFEQIQHCVAHCATROPTLL-----G
yNAGK WHFDKSGSYLKGKVLFWYGIDDINTISELVENFVKSDTASTLNS-----SASS
mNAGS-M WYFKHSDGSFSNKQWIFFWFLADIRDSYELVN HAKGLPDSFCFKPAS-----DPGS
hNAGS-M WYFKHSDGSFSNKQWIFFWFLADIRDSYELVN HAKGLPDSFHKPAS-----DPGS
zfNAGS WYFKHSDGSFVNGHWIVFWLGLSDIRESYELVEFAKSHPD SFCSLSTETKPLQHHGS
: : : : * . . . * * . . * : : :
:

```

**Figure S1.** Multiple sequence and structure alignment of human, mouse and zebrafish NAGS, yeast NAGK (yNAGK), and bifunctional MmNAGS-K and XcNAGS-K. Three-dimensional structures 3S6H, 3S6K and 3ZZI of MmNAGS-K, XcNAGS-K and yNAGSK, respectively, were used in the alignment after manual removal of the polyhistidine affinity tag sequences. Reference sequences of human, mouse and zebrafish NAGS (accession numbers: NP\_694551, NP\_665828 and XP\_685919, respectively) were used in the alignment after manual removal of predicted mitochondrial targeting sequences. Proteins were aligned using Expresso structural alignment algorithm ([www.tcoffee.org](http://www.tcoffee.org)).



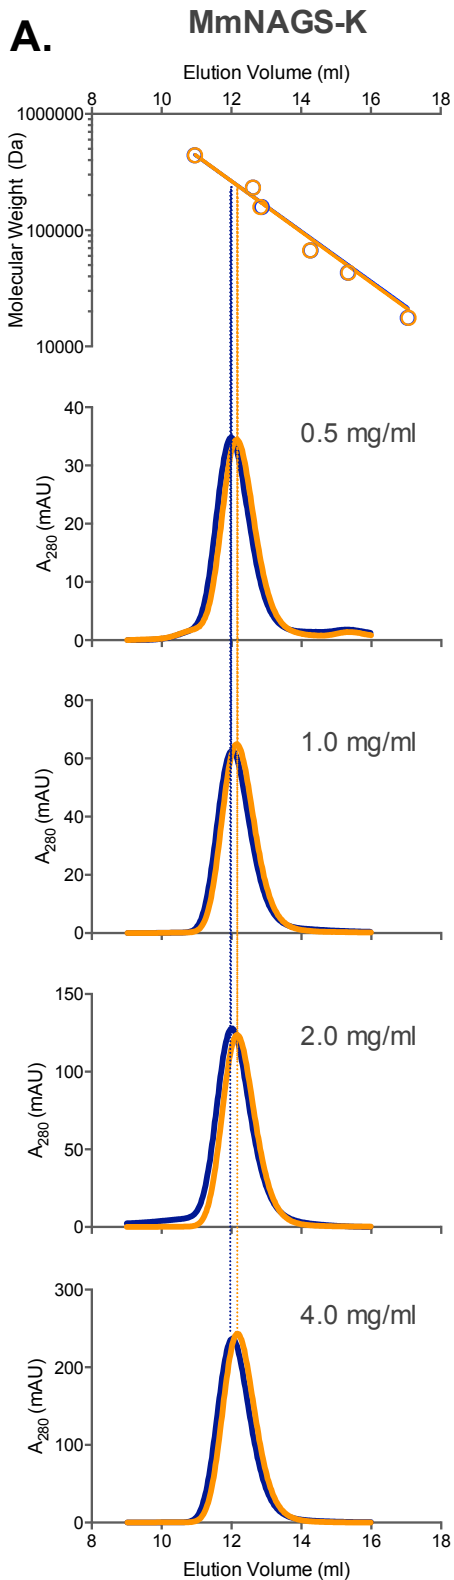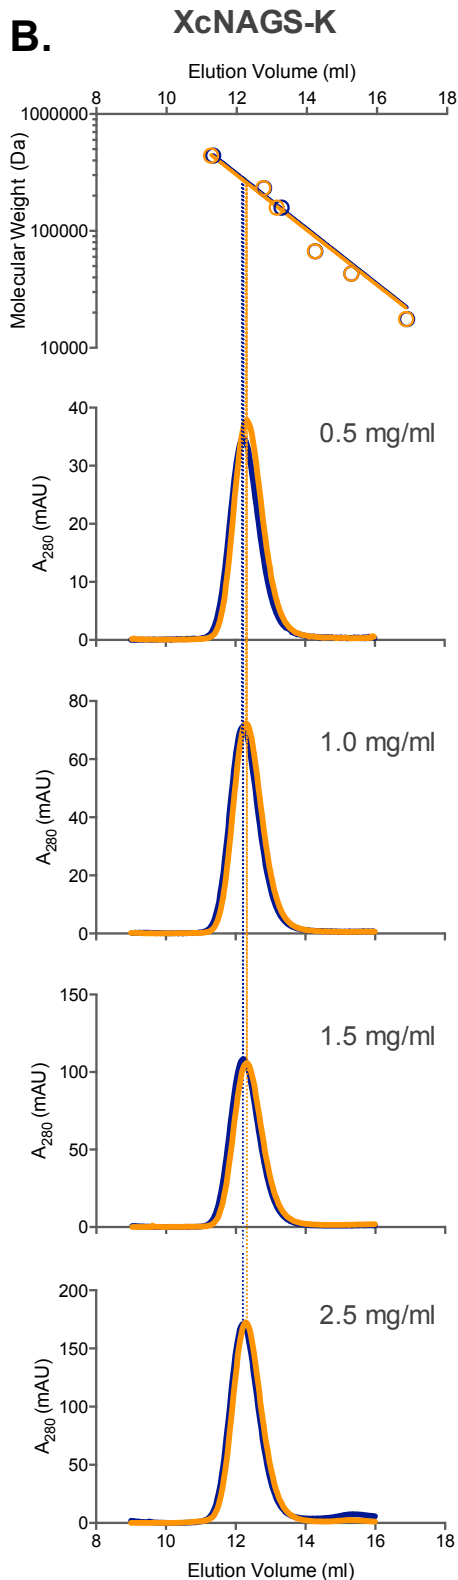

**Figure S2.** Analytical gel chromatography of MmNAGS-K (A) and XcNAGS-K (B) with and without L-arginine. The top panels show a semi-logarithmic plot of molecular mass vs. elution volume. Open circles correspond to elution volumes of ferritin (440 kDa), catalase (232 kDa), aldolase (158 kDa), bovine serum albumin (66 kDa), ovalbumin (43 kDa), and myoglobin (16 kDa). Lower panels show absorption at 280 nm as a function of elution volume and concentration of each protein loaded on the column. Blue - elution profiles in the absence of L-arginine. Orange – elution profiles in the presence of 1 mM L-arginine.

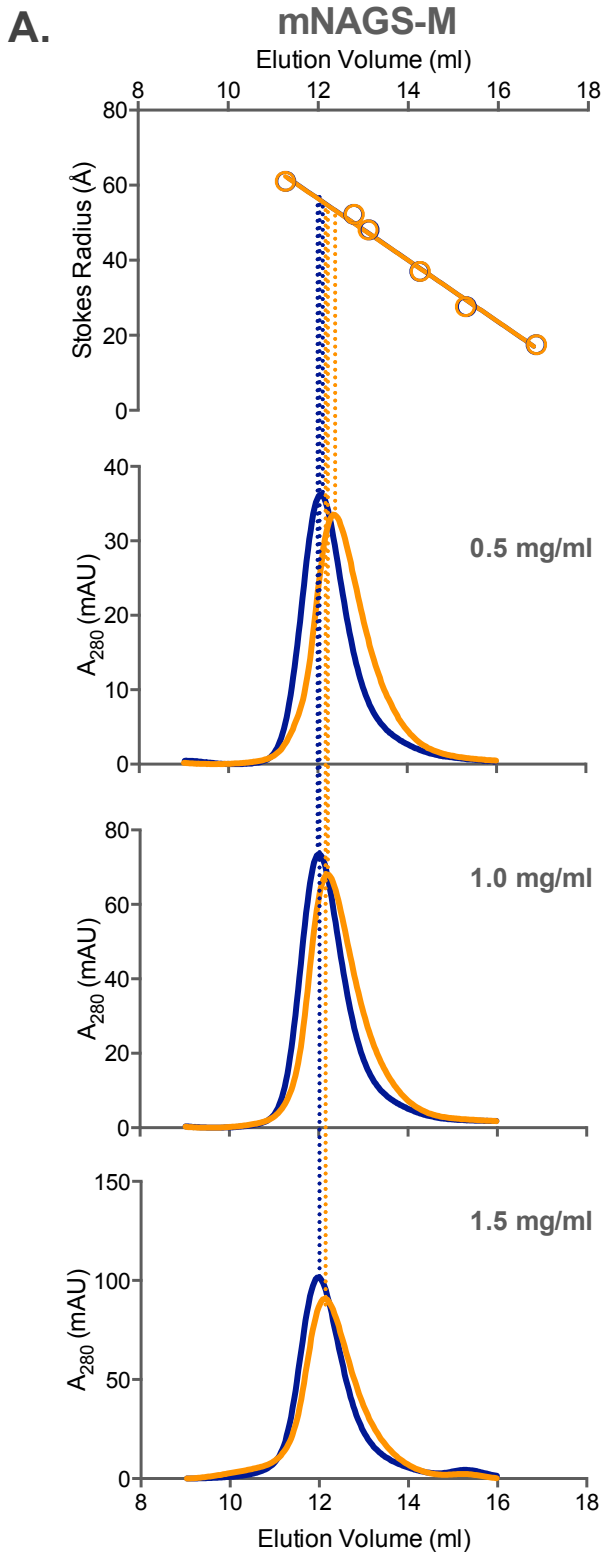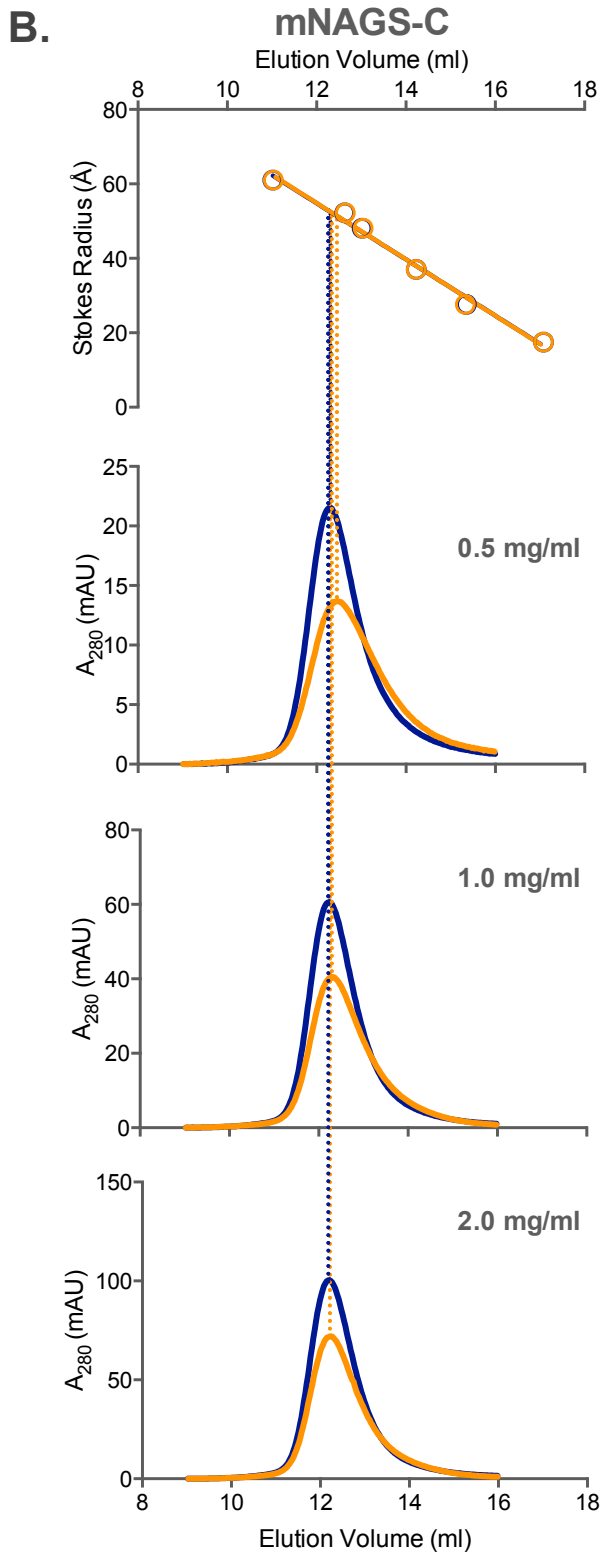

**Figure S3.** Analytical gel chromatography of mNAGS-M (A) and mNAGS-C (B) with and without L-arginine. The top panels show plots of Stokes' radii vs. elution volume. Open circles correspond to elution volumes of ferritin (61.0 Å), catalase (52.2 Å), aldolase (48.1 Å), bovine serum albumin (37.0 Å), ovalbumin (27.6 Å), and myoglobin (17.5 Å). Lower panels show absorption at 280 nm as a function of elution volume and concentration of each protein loaded on the column. Blue - elution profiles of mNAGS-M and mNAGS-C without arginine. Orange – elution profiles of mNAGS-M and mNAGS-C in the presence of 1 mM arginine.

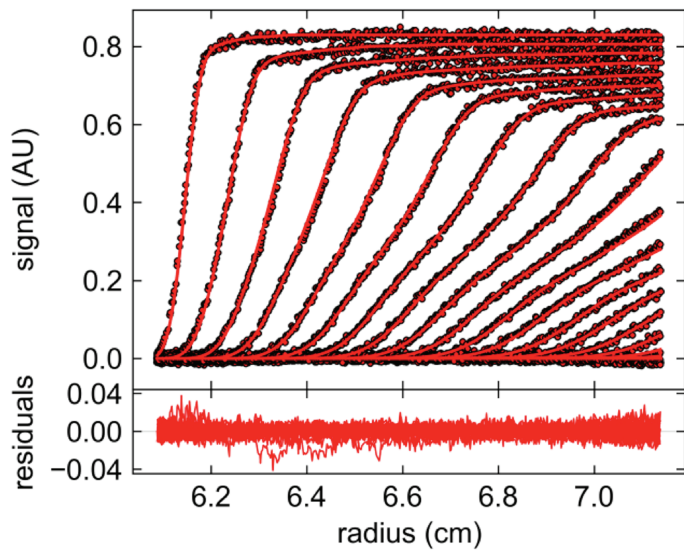

Figure S4. Raw sedimentation velocity profile (black circles) for Xc-NAGS (0.64 mg/mL, which corresponds to 12  $\mu$ M monomer concentration) in the absence of L-arginine in overlay with the best-fit curves resulting from the  $c(s)$  sedimentation coefficient distribution analysis (upper panel). The residuals from the  $c(s)$  analysis with root-mean-square differences of 0.0063 OD (lower panel).

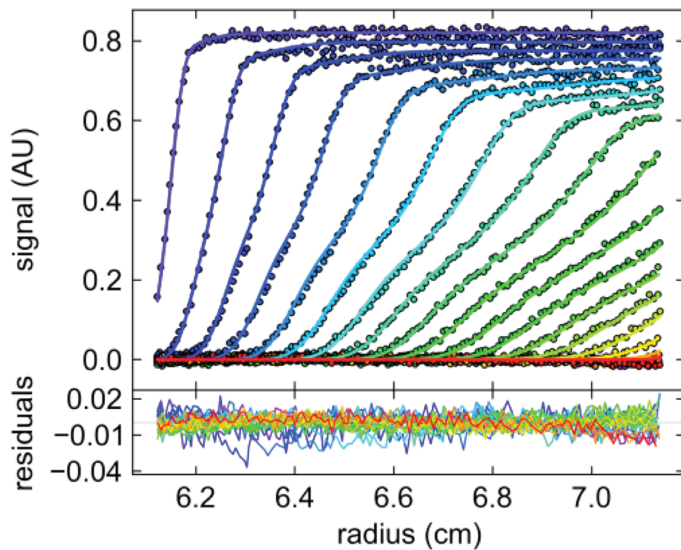

Figure S5. The raw sedimentation velocity profile for XcNAGS (0.64 mg/mL, which corresponds to 12  $\mu$ M monomer concentration) in presence of 1 mM arginine (circles) overlaid by the best-fit curves resulting from a Global analysis of seven data sets at several loading concentrations (solid lines) fit to a tetramer-octomer association model using explicit Lamm Equation solutions with reaction kinetics. The best fit  $K_d$  is 2.6  $\mu$ M [2.2 – 3.1].
